# Supplementary material
Source: Springer Nature journal article supplement (https://www.springermedizin.de/resource/supplementary/13000_2009_255_MOESM3_ESM.pdf/9624170)

# Detected peaks

0

Normal

1

Tumor

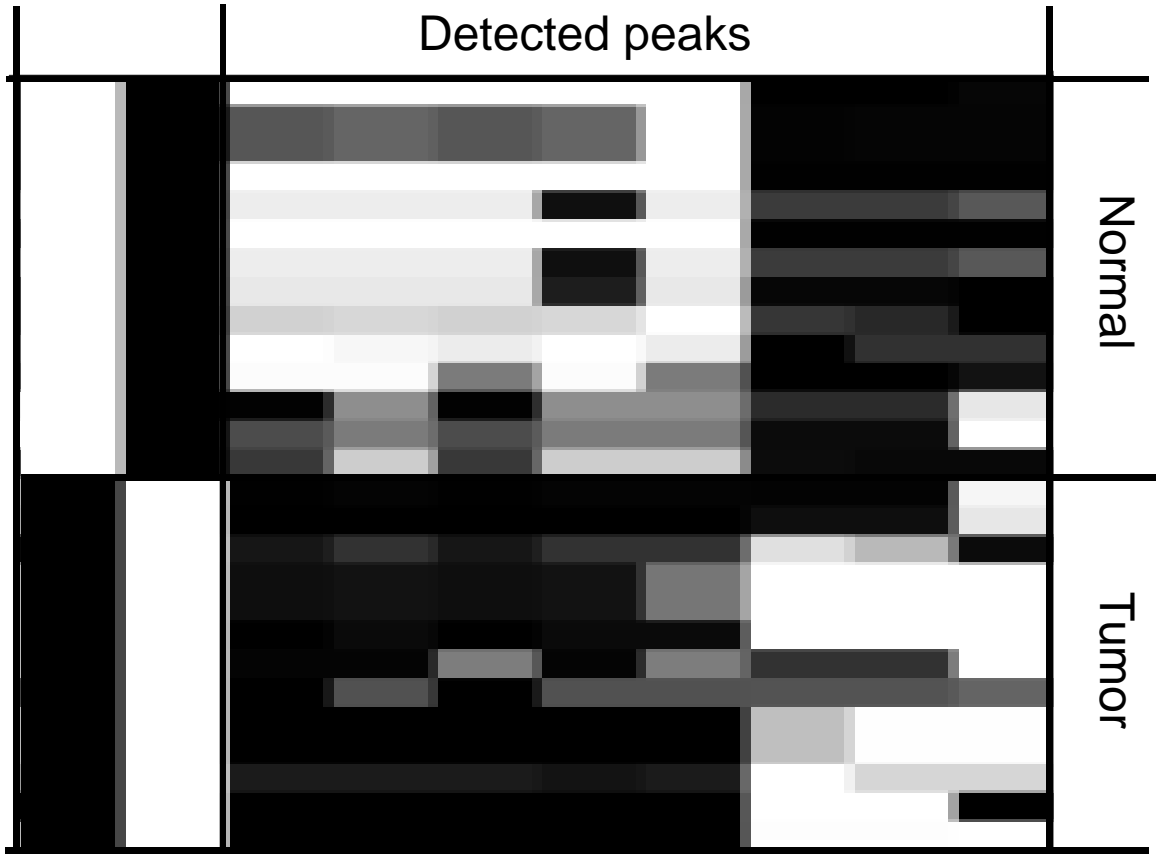

Supplement: MOESM3 [file 9624170]
